# Supplementary material for: Wearable activity monitors to assess performance status and predict clinical outcomes in advanced cancer patients
Source: PubMed Central journal article supplement (PMC6550281; doi:10.1038/s41746-018-0032-6), 2018-07-05
Supplement: 41746_2018_32_MOESM1_ESM.pdf [file 41746_2018_32_MOESM1_ESM.pdf]

## Supplementary material

Supplementary Table 1. Comparison of ECOG and KPS scales

| ECOG Performance Status <sup>1</sup>                                                                  | Karnofsky Performance Status (KPS) <sup>2</sup>                                                                                                                                     |
|-------------------------------------------------------------------------------------------------------|-------------------------------------------------------------------------------------------------------------------------------------------------------------------------------------|
| <b>0:</b> Fully active, no restriction in pre-disease performance                                     | <b>100:</b> Normal; no evidence of disease                                                                                                                                          |
| <b>1:</b> Restricted in physically strenuous activity but ambulatory and able to carry out light work | <b>90:</b> Minor signs or symptoms<br><b>80:</b> Normal activity with effort; some signs or symptoms                                                                                |
| <b>2:</b> Ambulatory; capable of all self-care but unable to work; up more than 50% of walking hours  | <b>70:</b> Cares for self; unable to carry on normal activity<br><b>60:</b> Occasional assistance required; capable of most self-care                                               |
| <b>3:</b> Capable of only limited self-care; confined to bed/chair >50% walking hours                 | <b>50:</b> Requires assistance, frequent medical care<br><b>40:</b> Disabled; requires special care/assistance                                                                      |
| <b>4:</b> Not capable of self-care; totally confined to bed/chair                                     | <b>30:</b> Severely disabled; requires special care/assistance<br><b>20:</b> Hospitalization necessary; requires active supportive care<br><b>10:</b> Moribund; progressing rapidly |
| <b>5:</b> Dead                                                                                        | <b>0:</b> Dead                                                                                                                                                                      |

1. Karnofsky DA. The clinical evaluation of chemotherapeutic agents in cancer. *Evaluation of chemotherapeutic agents*. 1949
2. Zubrod CG, Schneiderman M, Frei E, Brindley C, Lennard Gold G, et al. Appraisal of methods for the study of chemotherapy of cancer in man: comparative therapeutic trial of nitrogen mustard and triethylene thiophosphoramide. *Journal of Chronic Diseases*. 1960;11(1):7-33.

Supplementary Table 2. Table of events

| Procedures                                                              | Screening/<br>Baseline | Mid-Study<br>Visit | End of<br>study | Follow-up<br>(6 months) |
|-------------------------------------------------------------------------|------------------------|--------------------|-----------------|-------------------------|
| Consent                                                                 | X                      |                    |                 |                         |
| Physical examination<br>(height, weight, heart rate, blood<br>pressure) | X                      |                    | X               |                         |
| Demographics<br>(age, sex, occupational status,<br>education)           | X                      |                    |                 |                         |
| Medical History<br>(Comorbidities, concomitant<br>medications)          | X                      |                    |                 |                         |
| NIH PROMIS® questionnaires                                              | X                      | X                  | X               |                         |
| Performance Status (ECOG, KPS)<br>assessed by MD and RN                 | X                      | X                  | X               |                         |
| Frailty (hand grip, walking test, weight<br>loss, physical activity)    | X                      |                    | X               |                         |
| Feasibility Interview                                                   |                        |                    | X               |                         |
| Clinical Outcomes<br>(Adverse Events, Hospitalization,<br>Survival)     |                        |                    | X               | X                       |
| FitBit Charge HR® daily activity<br>(Steps, stairs, heart rate, sleep)  | X                      | X                  | X               |                         |

Supplementary Table 3. Number of grade 3 or 4 toxicities

| Adverse Event <sup>1</sup>    | N <sup>2</sup> | %    |
|-------------------------------|----------------|------|
| Ascites                       | 7              | 19.4 |
| Gastrointestinal hemorrhage   | 4              | 11.1 |
| Anemia                        | 3              | 8.3  |
| Abdominal Pain                | 2              | 5.6  |
| Dyspnea                       | 2              | 5.6  |
| Encephalopathy                | 2              | 5.6  |
| Hypernatremia                 | 2              | 5.6  |
| Sepsis                        | 2              | 5.6  |
| Weight loss                   | 2              | 5.6  |
| Aspiration                    | 1              | 2.8  |
| Biliary Tract infection       | 1              | 2.8  |
| Cough                         | 1              | 2.8  |
| Diarrhea                      | 1              | 2.8  |
| Hypoxia                       | 1              | 2.8  |
| Peripheral Sensory Neuropathy | 1              | 2.8  |
| Rash pustular                 | 1              | 2.8  |
| Seizure                       | 1              | 2.8  |
| Skin infection                | 1              | 2.8  |
| Thromboembolic event          | 1              | 2.8  |

<sup>1</sup>Excluding elective procedures and laboratory adverse events

<sup>2</sup>Patients could have more than one AE
